# Supplementary material for: The impact of COVID-19 vaccination campaigns accounting for antibody-dependent enhancement
Source: PubMed Central journal article supplement (PMC8061987; doi:10.1371/journal.pone.0245417), 2021-04-22

$$B = f_{\text{Sick}} + (1 - f_{\text{Sick}})f_I^{(U,+)}$$

$$\tilde{B} = 1 - B = 1 - f_{\text{Sick}} - (1 - f_{\text{Sick}})f_I^{(U,+)}$$

$$A = f_{\text{Sick}} f_{\text{Dead}}$$

$$\tilde{A} = 1 - A$$

$$A^{(e)} = f_{\text{Sick}}^{(e)} f_{\text{Dead}}^{(e)} \quad \text{for } e = \text{"V", "NI", "PI", "ADE", "I,*", "L,*"}$$

$$\tilde{A}^{(e)} = 1 - A^{(e)}$$

$$\textcircled{1} = \delta f_{\text{Sick}}^{(U,+)} f_{\text{Dead}}$$

$$\textcircled{2} = \delta (1 - f_{\text{Sick}}^{(U,+)} f_{\text{Dead}})$$

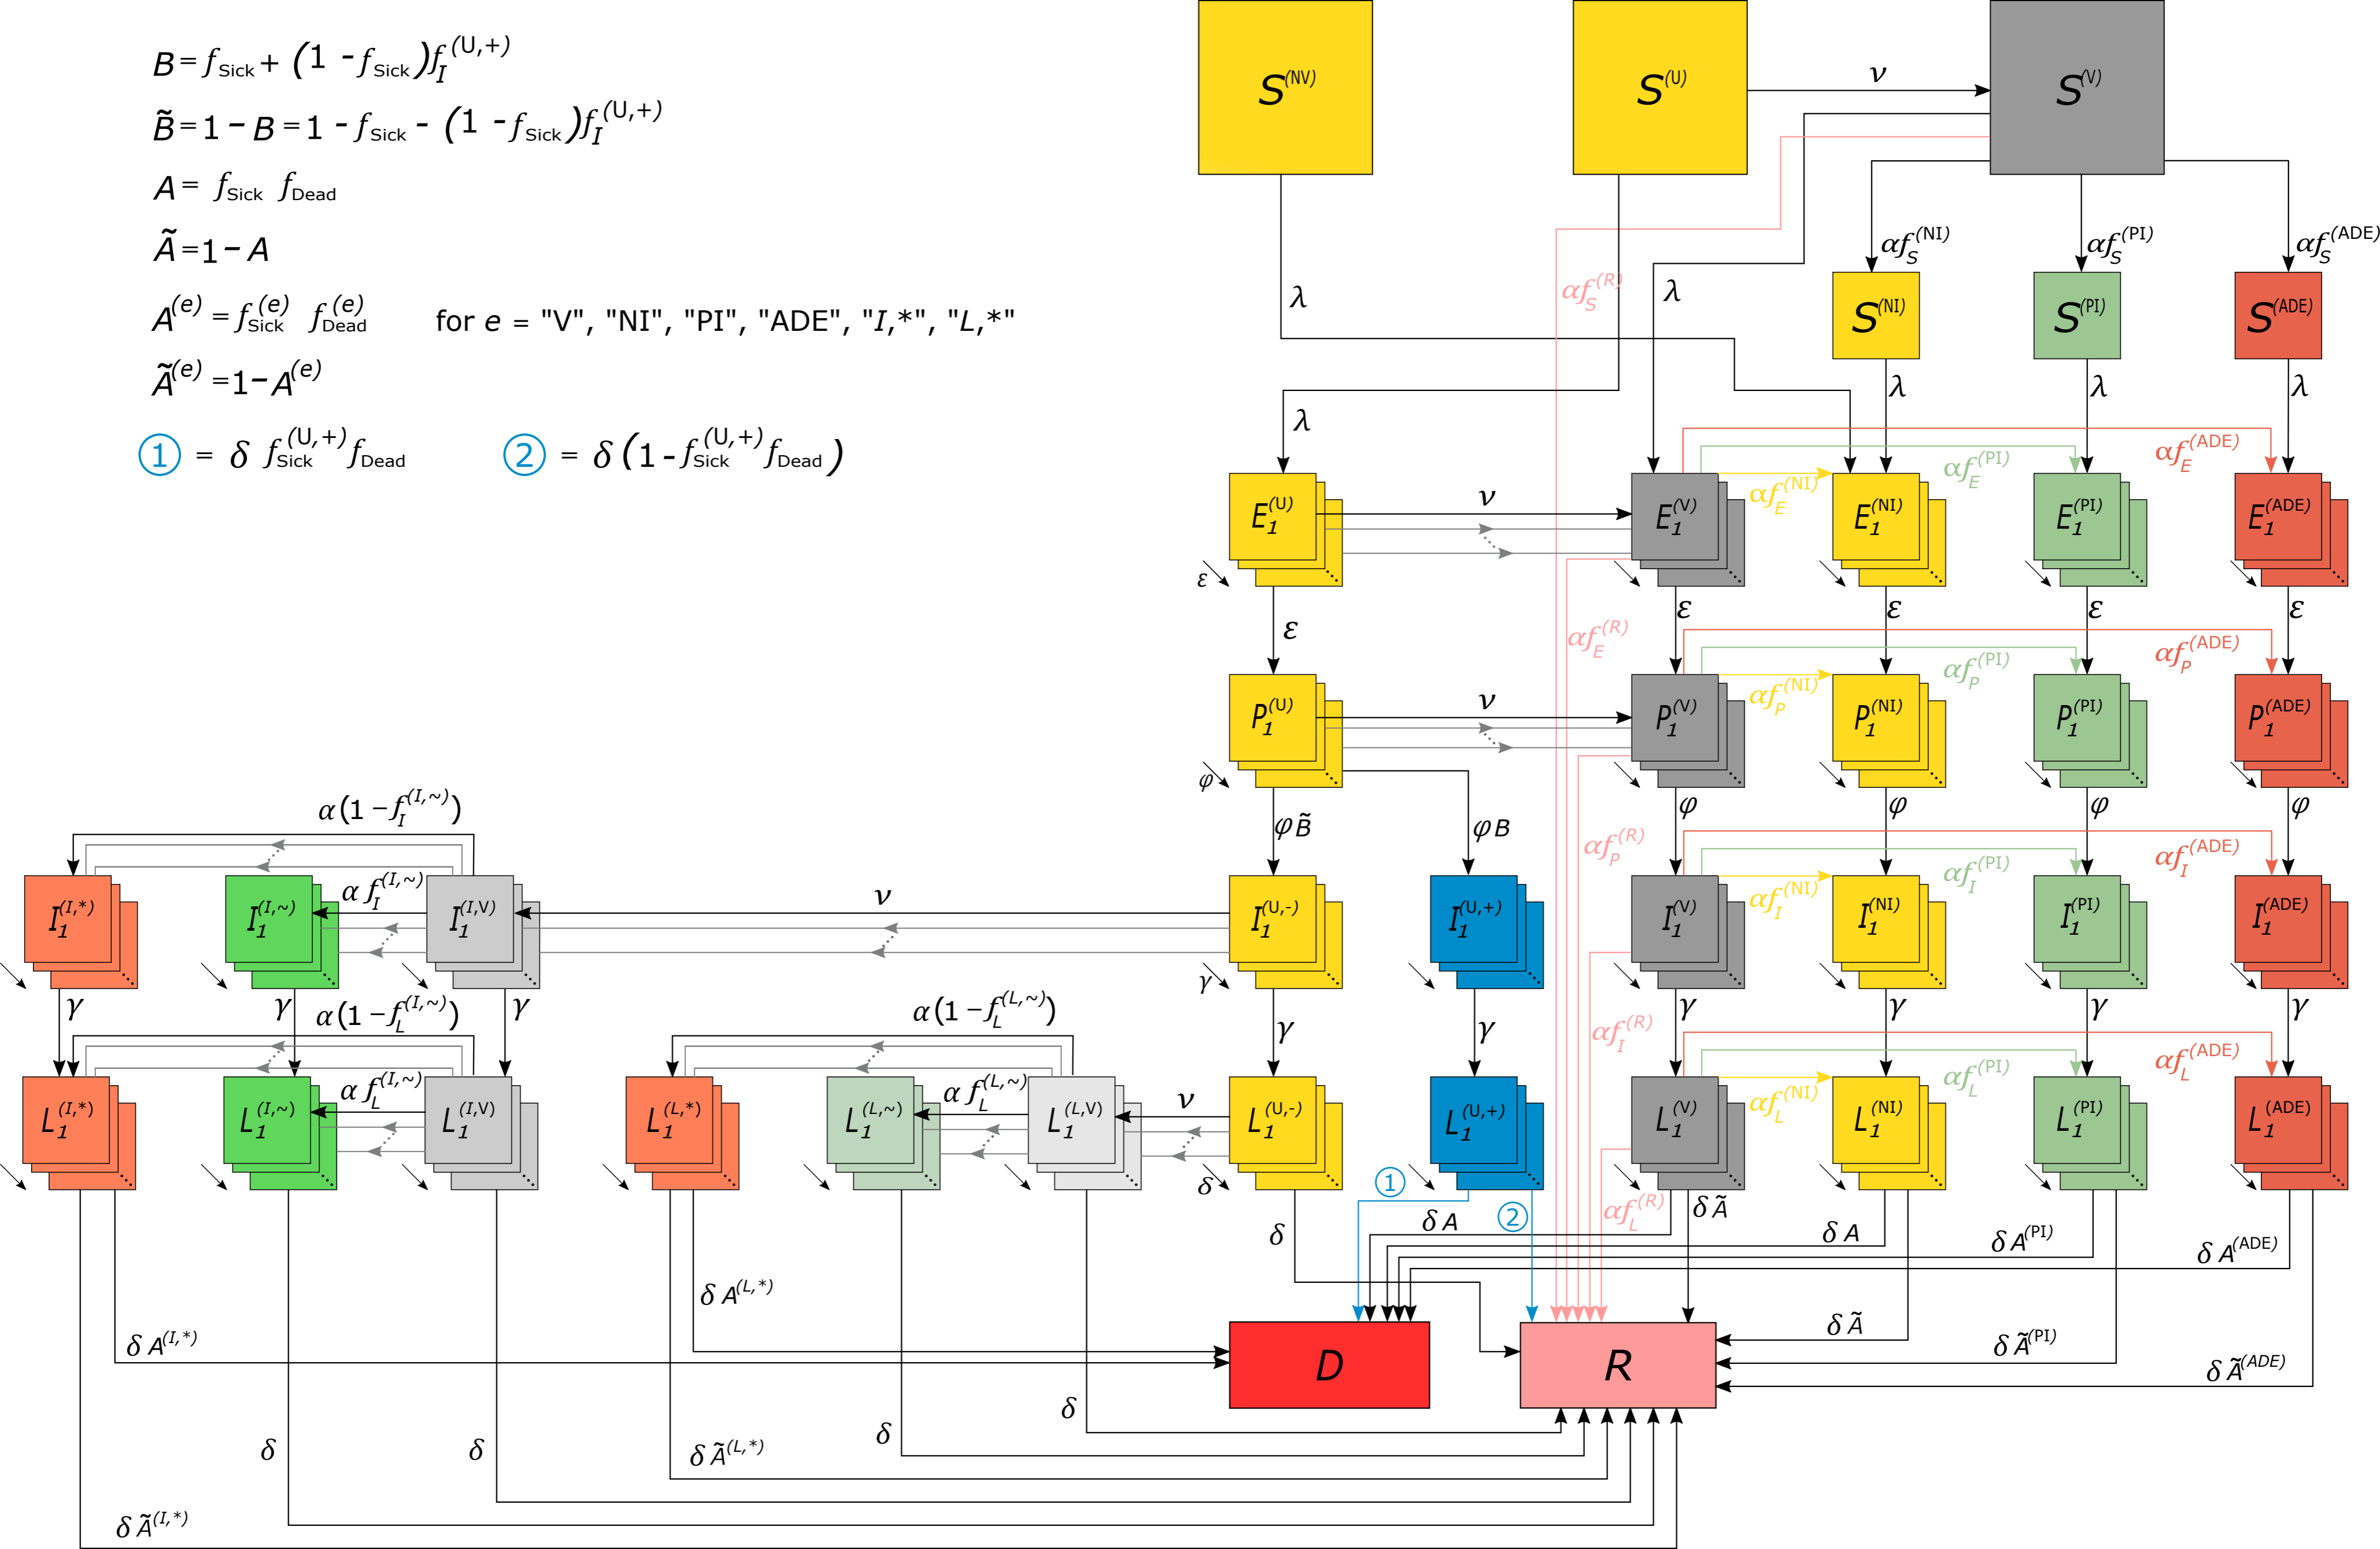

Supplement: pone.0245417.s002.pdf [file pone.0245417.s002.pdf]
