# Supplementary material for: The impact of COVID-19 vaccination campaigns accounting for antibody-dependent enhancement
Source: PubMed Central journal article supplement (PMC8061987; doi:10.1371/journal.pone.0245417), 2021-04-22
Supplement: pone.0245417.s003.pdf [file pone.0245417.s003.pdf]

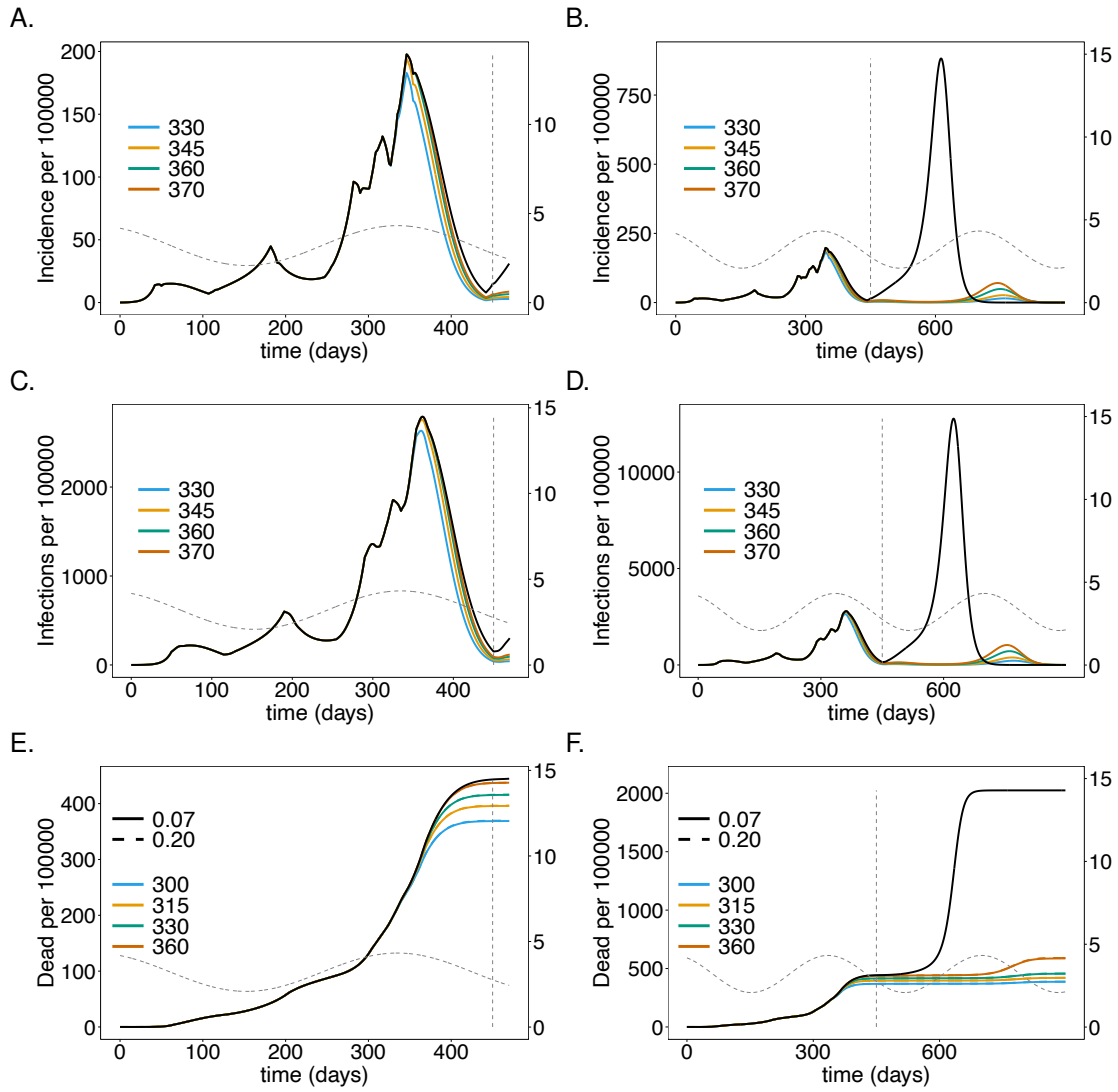

**S2 Fig. Onset of the vaccination campaign:** As in Fig 4 but for U.S. instead of Germany. Parameters for contact reduction are given in S7 Table.
