# Supplementary material for: The impact of COVID-19 vaccination campaigns accounting for antibody-dependent enhancement
Source: PubMed Central journal article supplement (PMC8061987; doi:10.1371/journal.pone.0245417), 2021-04-22
Supplement: pone.0245417.s005.pdf [file pone.0245417.s005.pdf]

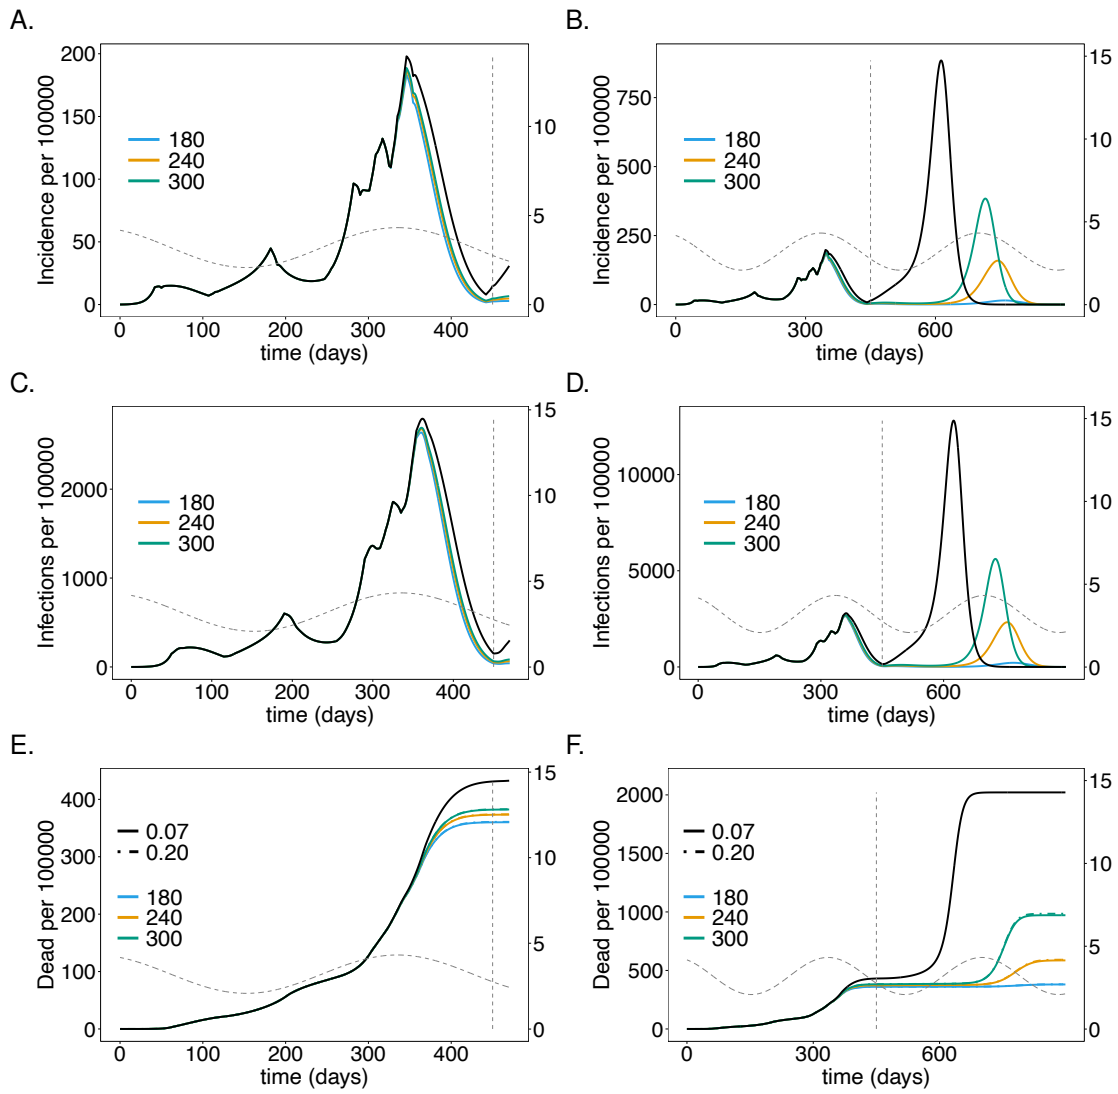

**S4 Fig. Vaccination rate.** As Fig 6, but for the USA instead of Germany.
