# Supplementary material for: The impact of COVID-19 vaccination campaigns accounting for antibody-dependent enhancement
Source: PubMed Central journal article supplement (PMC8061987; doi:10.1371/journal.pone.0245417), 2021-04-22
Supplement: pone.0245417.s011.pdf [file pone.0245417.s011.pdf]

**S1 Table.** (Sub-) population sizes of Germany (GER) and the USA chosen in simulations.

| Parameter  | Description                                                    | GER        | USA         |
|------------|----------------------------------------------------------------|------------|-------------|
| $N$        | Total population size                                          | 83 000 000 | 331 000 000 |
| $N^{(NV)}$ | Size of unvaccinable population (40% of $N$ )                  | 33 200 000 | 132 400 000 |
| $N^{(U)}$  | No. of individuals waiting to be vaccinated ( $N - N^{(NV)}$ ) | 49 800 000 | 198 600 000 |
