# Supplementary material for: The impact of COVID-19 vaccination campaigns accounting for antibody-dependent enhancement
Source: PubMed Central journal article supplement (PMC8061987; doi:10.1371/journal.pone.0245417), 2021-04-22
Supplement: pone.0245417.s012.pdf [file pone.0245417.s012.pdf]

**S2 Table.** Parameters describing disease progression for Germany (GER) and the USA.

| Parameter     | Description                                         | Value                  |
|---------------|-----------------------------------------------------|------------------------|
| $n_E$         | No. of latent sub-states (Erlang states)            | 16                     |
| $n_P$         | No. of prodromal sub-states (Erlang states)         | 16                     |
| $n_I$         | No. of fully infectious sub-states (Erlang states)  | 16                     |
| $n_L$         | No. of late infectious sub-states (Erlang states)   | 16                     |
| $D_E$         | Average duration of latent period                   | 3.7 days               |
| $D_P$         | Average duration of prodromal period                | 1 day                  |
| $D_I$         | Average duration of fully infectious period         | 5 days                 |
| $D_L$         | Average duration of late infectious period          | 5 days                 |
| $\varepsilon$ | Transition rate of latent sub-states                | $n_E/D_E$              |
| $\varphi$     | Transition rate of prodromal sub-states             | $n_P/D_P$              |
| $\gamma$      | Transition rate of fully infectious sub-states      | $n_I/D_I$              |
| $\delta$      | Transition rate of late infectious sub-states       | $n_L/D_L$              |
| $\alpha$      | Average waiting time for the outcome of the vaccine | 1/28, 1/42             |
| $\nu$         | Rate at which individuals get vaccinated            | 0, 1/180, 1/240, 1/300 |

Parameters describing disease progression and their values used in the simulations. Abbreviations: No. ... Number.
