# Supplementary material for: The impact of COVID-19 vaccination campaigns accounting for antibody-dependent enhancement
Source: PubMed Central journal article supplement (PMC8061987; doi:10.1371/journal.pone.0245417), 2021-04-22
Supplement: pone.0245417.s013.pdf [file pone.0245417.s013.pdf]

**S3 Table.** Summary of variables describing sub-population sizes in Germany (GER) and the USA.

| Name                | Description                                                                             | Initial Values               |             |
|---------------------|-----------------------------------------------------------------------------------------|------------------------------|-------------|
|                     |                                                                                         | GER                          | USA         |
| $S^{(NV)}(t)$       | Unvaccinable susceptibles (anti-vaxxers & inds. that cannot be vaccinated)              | 33 200 000                   | 132 400 000 |
| $S^{(U)}(t)$        | Susceptibles waiting to be vaccinated                                                   | 49 799 800                   | 198 599 925 |
| $S^{(V)}(t)$        | Vaccinated susceptibles with pending vaccine outcome                                    |                              | 0           |
| $S^{(NI)}(t)$       | Vaccinated susceptibles that failed to immunize                                         |                              | 0           |
| $S^{(PI)}(t)$       | Vaccinated susceptibles who developed partial immunity                                  |                              | 0           |
| $S^{(ADE)}(t)$      | Vaccinated susceptibles who developed ADE                                               |                              | 0           |
| $E_k^{(U)}(t)$      | Latently inf. inds. waiting to be vaccinated                                            |                              | 0           |
| $E_k^{(V)}(t)$      | Vaccinated latently inf. inds. with pending vaccine outcome                             |                              | 0           |
| $E_k^{(NI)}(t)$     | Unvaccinable latently inf. inds. and vaccinated ones who failed to immunize             |                              | 0           |
| $E_k^{(PI)}(t)$     | Vaccinated latently inf. inds. who developed partial immunity                           |                              | 0           |
| $E_k^{(ADE)}(t)$    | Vaccinated latently inf. inds. who developed ADE                                        |                              | 0           |
| $P_k^{(U)}(t)$      | Vaccinated prodromal inds. waiting to be vaccinated                                     |                              | 0           |
| $P_k^{(V)}(t)$      | Vaccinated prodromal inds. with pending vaccine outcome                                 |                              | 0           |
| $P_k^{(NI)}(t)$     | Unvaccinable prodromal inds. and vaccinated ones who failed to immunize                 |                              | 0           |
| $P_k^{(PI)}(t)$     | Vaccinated prodromal inds. who developed partial immunity                               |                              | 0           |
| $P_k^{(ADE)}(t)$    | Vaccinated prodromal inds. who developed ADE                                            |                              | 0           |
|                     |                                                                                         | GER                          | USA         |
| $I_k^{(U,-)}(t)$    | Undiagnosed and asymptomatic fully inf. inds. waiting to be vaccinated                  | $k = 1$ : 200<br>$k > 1$ : 0 | 75<br>0     |
| $I_k^{(U,+)}(t)$    | Diagnosed or symptomatic fully inf. inds. that were waiting to get vaccinated           |                              | 0           |
| $I_k^{(V)}(t)$      | Fully inf. inds. with pending vaccine outcome                                           |                              | 0           |
| $I_k^{(NI)}(t)$     | Unvaccinable fully inf. inds. and vaccinated ones who failed to immunize                |                              | 0           |
| $I_k^{(PI)}(t)$     | Vaccinated fully inf. inds. who developed partial immunity                              |                              | 0           |
| $I_k^{(ADE)}(t)$    | Vaccinated fully inf. inds. who developed ADE                                           |                              | 0           |
| $I_k^{(I,V)}(t)$    | Fully inf. inds. who were vaccinated during this phase with pending vaccine outcome     |                              | 0           |
| $I_k^{(I,\sim)}$    | Fully inf. inds. who were vaccinated during this phase and had a neutral outcome        |                              | 0           |
| $I_k^{(I,*)}$       | Fully inf. inds. who were vaccinated during this phase and had a del. outcome           |                              | 0           |
| $L_k^{(U,+)}(t)$    | Diagnosed or symptomatic late inf. inds. that were waiting to get vaccinated            |                              | 0           |
| $L_k^{(U,-)}(t)$    | Undiagnosed and asymptomatic late inf. inds. waiting to be vaccinated                   |                              | 0           |
| $L_k^{(V)}(t)$      | Late inf. inds. with pending vaccine outcome                                            |                              | 0           |
| $L_k^{(NI)}(t)$     | Unvaccinable late inf. inds. and vaccinated ones who failed to immunize                 |                              | 0           |
| $L_k^{(PI)}(t)$     | Vaccinated late inf. inds. who developed partial immunity                               |                              | 0           |
| $L_k^{(ADE)}(t)$    | Vaccinated late inf. inds. who developed ADE                                            |                              | 0           |
| $L_k^{(I,V)}(t)$    | Late inf. inds. who were vaccinated while fully infectious with pending vaccine outcome |                              | 0           |
| $L_k^{(I,\sim)}(t)$ | Late inf. inds. who were vaccinated while fully infectious and had a neutral outcome    |                              | 0           |
| $L_k^{(I,*)}(t)$    | Late inf. inds. who were vaccinated while fully infectious and had a del. outcome       |                              | 0           |
| $L_k^{(L,V)}(t)$    | Late inf. inds. who were vaccinated during this phase with pending vaccine outcome      |                              | 0           |
| $L_k^{(L,\sim)}(t)$ | Late inf. inds. who were vaccinated during this phase and had a neutral outcome         |                              | 0           |
| $L_k^{(L,*)}(t)$    | Late inf. inds. who were vaccinated during this phase and had a del. outcome            |                              | 0           |
| $R(t)$              | Recovered or fully immunized individuals                                                |                              | 0           |
| $D(t)$              | Dead individuals                                                                        |                              | 0           |

Summary of all model compartments and their initial values chosen for simulation. Abbreviations: del... deleterious; inf. ... infectious; inds. ... individuals.
