# Supplementary material for: The impact of COVID-19 vaccination campaigns accounting for antibody-dependent enhancement
Source: PubMed Central journal article supplement (PMC8061987; doi:10.1371/journal.pone.0245417), 2021-04-22
Supplement: pone.0245417.s014.pdf [file pone.0245417.s014.pdf]

**S4 Table.** Parameters describing disease severity and mortality for Germany (GER) and the USA.

| Parameters          | Description                                                                           | Value       |           |
|---------------------|---------------------------------------------------------------------------------------|-------------|-----------|
|                     | Fraction of ...                                                                       |             |           |
| $f_S^{(NI)}$        | ...susceptibles that fails to immunize after vaccination                              | cf. Table 1 |           |
| $f_S^{(PI)}$        | ...susceptibles that develops partial immunity after vaccination                      |             | -         |
| $f_S^{(ADE)}$       | ...susceptibles that develops ADE after vaccination                                   |             | -         |
| $f_S^{(R)}$         | ...susceptibles that develops permanent immunity after vaccination                    |             | -         |
| $f_E^{(NI)}$        | ...latently inf. that fails to immunize after vaccination                             | cf. Table 1 |           |
| $f_E^{(PI)}$        | ...latently inf. inds. that develops partial immunity after vaccination               |             | -         |
| $f_E^{(ADE)}$       | ...latently inf. that develops ADE after vaccination                                  |             | -         |
| $f_E^{(R)}$         | ...latently inf. that develops permanent immunity                                     |             | -         |
| $f_P^{(NI)}$        | ...prodromal inds. that fails to immunize after vaccination                           | cf. Table 1 |           |
| $f_P^{(PI)}$        | ...prodromal inds. that develops partial immunity after vaccination                   |             | -         |
| $f_P^{(ADE)}$       | ...prodromal inds. that develops ADE after vaccination                                |             | -         |
| $f_P^{(R)}$         | ...prodromal inds. that develops permanent immunity after vaccination                 |             | -         |
| $f_I^{(U, +)}$      | ...detected or sympt. fully inf. inds. that were waiting for vaccination              |             | 0.005     |
| $f_I^{(NI)}$        | ...fully inf. inds. that fails to immunize after vaccination                          | cf. Table 1 |           |
| $f_I^{(PI)}$        | ...fully inf. inds. that develops partial immunity after vaccination                  |             | -         |
| $f_I^{(ADE)}$       | ...fully inf. inds. that develops ADE after vaccination                               |             | -         |
| $f_I^{(R)}$         | ...fully inf. inds. that develops permanent immunity after vaccination                |             | -         |
| $f_I^{(I, \sim)}$   | ...fully infectious inds. vaccinated during this phase with neutral outcome           |             | 0.95      |
| $f_L^{(NI)}$        | ...late inf. inds. that fails to immunize after vaccination                           |             | 0         |
| $f_L^{(PI)}$        | ...late inf. inds. that develops partial immunity after vaccination                   |             | 0         |
| $f_L^{(ADE)}$       | ...late inf. inds. that develops ADE after vaccination                                |             | 0         |
| $f_L^{(R)}$         | ...late inf. inds. that develops permanent immunity after vaccination                 |             | 0         |
| $f_L^{(I, \sim)}$   | ...late infectious inds. vaccinated during the fully inf. phase with neutral outcome  |             | 0.95      |
| $f_L^{(L, \sim)}$   | ...late infectious inds. vaccinated during this phase with neutral outcome            |             | 0.99      |
|                     |                                                                                       | GER         | USA       |
| $f_{Sick}$          | ...sympt. individuals                                                                 | 0.58        | 0.58      |
| $f_{Dead}$          | ...sympt. inds. who die from COVID-19                                                 | 0.016       | 0.04      |
| $f_{Iso}$           | ...inds. who are isolated                                                             | 0.58        | 0.48      |
| $f_{Sick}^{(PI)}$   | ...sympt. inds. with partial immunity                                                 |             | 0.50      |
| $f_{Dead}^{(PI)}$   | ...sympt. inds. with partial immunity who die from COVID-19                           |             | 0.02      |
| $f_{Dead}^{(ADE)}$  | ...sympt. inds. with ADE who die from COVID-19                                        |             | 0.07, 0.2 |
| $f_{Sick}^{(U, +)}$ | ...sympt. or diagnosed individuals that were waiting to be vaccinated                 |             | cf. eq. 3 |
| $f_{Sick}^{(ADE)}$  | ...sympt. inds. with ADE                                                              |             | 0.92      |
| $f_{Sick}^{(I, *)}$ | ...sympt. fully inf. inds. vaccinated during this phase with del. outcome             |             | 0.58      |
| $f_{Dead}^{(I, *)}$ | ...lethal infs. among fully inf. inds. vaccinated during this phase with del. outcome |             | 0.07      |
| $f_{Sick}^{(L, *)}$ | ...sympt. late inf. inds. vaccinated during this phase with del. outcome              |             | 0.58      |
| $f_{Dead}^{(L, *)}$ | ...lethal infs. among late inf. inds. vaccinated during this phase with del. outcome  |             | 0.07      |

Abbreviations: del. ...deleterious; eq. ...Equation; inf. ...infectious; infs. ...infections; inds. ...individuals; sympt. ...symptomatic.
