# Supplementary material for: The impact of COVID-19 vaccination campaigns accounting for antibody-dependent enhancement
Source: PubMed Central journal article supplement (PMC8061987; doi:10.1371/journal.pone.0245417), 2021-04-22
Supplement: pone.0245417.s015.pdf [file pone.0245417.s015.pdf]

**S5 Table.** Parameters describing contact behavior and force of infection for Germany (GER) and the USA.

| Parameter              | Definition                                                          | Value/Eq. |                    |
|------------------------|---------------------------------------------------------------------|-----------|--------------------|
|                        |                                                                     | GER       | USA                |
| $\lambda_{\text{Ext}}$ | Infections from outside of the population                           | 45/day    | 50/day             |
| $\bar{R}_0$            | Annual average basic reproduction number                            | 3.4       | 3.2                |
| $a$                    | Amplitude of the seasonal fluctuation in $R_0$                      | 0.43      | 0.35               |
| $t_{R_0\text{max}}$    | Day when $R_0$ reaches its maximum                                  | 300       | 335                |
| $Q_{\text{max}}$       | Maximum capacity of isolation units per 10,000                      | 200       | 30                 |
| $t_{\text{Iso}_1}$     | Day case isolation measures start                                   | 30        | 20                 |
| $t_{\text{Iso}_2}$     | Day case isolation measures end                                     | 900       | 900                |
| $p_{\text{Home}}$      | Contact reduction in home isolation                                 |           | 75%                |
| $c_P$                  | Relative contagiousness in prodromal period                         |           | 0.5                |
| $c_I$                  | Relative contagiousness in fully inf. phase                         |           | 1                  |
| $c_L$                  | Relative contagiousness in late inf. phase                          |           | 0.5                |
| $\beta_P(t)$           | Seasonally varying effective contact rate of prodromal inds.        | cf. eq.   | <a href="#">7a</a> |
| $\beta_I(t)$           | Seasonally varying effective contact rate of fully infectious inds. | cf. eq.   | <a href="#">7b</a> |
| $\beta_L(t)$           | Seasonally varying effective contact rate of late infectious inds.  | cf. eq.   | <a href="#">7c</a> |

Abbreviations: eq. ... Equation; inf. ... infectious; inds. ... individuals.
