# Supplementary material for: The impact of COVID-19 vaccination campaigns accounting for antibody-dependent enhancement
Source: PubMed Central journal article supplement (PMC8061987; doi:10.1371/journal.pone.0245417), 2021-04-22
Supplement: pone.0245417.s016.pdf [file pone.0245417.s016.pdf]

**S6 Table.** Contact reduction parameters chosen for the simulations of Germany.

| Parameter           | Description                                                                     | Value |
|---------------------|---------------------------------------------------------------------------------|-------|
| $t_{\text{Dist}_1}$ | Day when first “hard lockdown” (general distancing) starts                      | 40    |
| $t_{\text{Dist}_2}$ | Day when first “hard lockdown” ends and first “relief period” starts            | 82    |
| $t_{\text{Dist}_3}$ | Day when first “relief period” ends and “soft lockdown” starts                  | 246   |
| $t_{\text{Dist}_4}$ | Day when “soft lockdown” ends and the second “hard lockdown” starts             | 280   |
| $t_{\text{Dist}_5}$ | Day when second “hard lockdown” ends and relief period starts                   | 397   |
| $t_{\text{Dist}_6}$ | Day when general contact reduction ends                                         | 450   |
| $p_{\text{Cont}_1}$ | General contact reduction between individuals during the first lockdown         | 70%   |
| $p_{\text{Cont}_2}$ | General contact reduction during the first “relief period”                      | 40%   |
| $p_{\text{Cont}_3}$ | General contact reduction during the “soft lockdown”                            | 50%   |
| $p_{\text{Cont}_4}$ | General contact reduction between individuals during the “hard lockdown”        | 68%   |
| $p_{\text{Cont}_5}$ | General contact reduction between individuals during the second “relief period” | 50%   |
