# Supplementary material for: The impact of COVID-19 vaccination campaigns accounting for antibody-dependent enhancement
Source: PubMed Central journal article supplement (PMC8061987; doi:10.1371/journal.pone.0245417), 2021-04-22
Supplement: pone.0245417.s017.pdf [file pone.0245417.s017.pdf]

**S7 Table.** Contact reduction parameters chosen for the simulations of the USA.

| Parameter           | Description                                                                     | Value |
|---------------------|---------------------------------------------------------------------------------|-------|
| $t_{\text{Dist}1}$  | Day when first contact restrictions (e.g. travel bans etc.) start               | 50    |
| $t_{\text{Dist}2}$  | Day when restrictions were partly lifted                                        | 115   |
| $t_{\text{Dist}3}$  | Day when first “relief period” ends and a “hard lockdown” starts                | 190   |
| $t_{\text{Dist}4}$  | Day when “hard lockdown” is relieved into a “soft lockdown”                     | 255   |
| $t_{\text{Dist}5}$  | Day when second “soft lockdown” ends and a new “hard lockdown” starts           | 290   |
| $t_{\text{Dist}6}$  | Day when second “hard lockdown” ends and a “relief period” starts               | 309   |
| $t_{\text{Dist}7}$  | Day when “relief period” ends and a subsequent “hard lockdown” starts           | 316   |
| $t_{\text{Dist}8}$  | Day when “hard lockdown” ends and a stronger lockdown starts                    | 325   |
| $t_{\text{Dist}9}$  | Day when stronger “hard lockdown” ends and a “soft lockdown” starts             | 335   |
| $t_{\text{Dist}10}$ | Day when “soft lockdown” ends and “hard lockdown” starts                        | 354   |
| $t_{\text{Dist}11}$ | Day when general contact reduction ends                                         | 450   |
| $p_{\text{Cont}1}$  | General contact reduction between individuals during the first lockdown         | 55%   |
| $p_{\text{Cont}2}$  | General contact reduction during the first “relief period”                      | 22%   |
| $p_{\text{Cont}3}$  | General contact reduction during the “hard lockdown”                            | 55%   |
| $p_{\text{Cont}4}$  | General contact reduction between individuals during the “soft lockdown”        | 45%   |
| $p_{\text{Cont}5}$  | General contact reduction between individuals during the second “hard lockdown” | 65%   |
| $p_{\text{Cont}6}$  | General contact reduction between individuals during the second “relief period” | 55%   |
| $p_{\text{Cont}7}$  | General contact reduction during the “hard lockdown”                            | 60%   |
| $p_{\text{Cont}8}$  | General contact reduction during the stronger “hard lockdown”                   | 70%   |
| $p_{\text{Cont}9}$  | General contact reduction between individuals during the “soft lockdown”        | 55%   |
| $p_{\text{Cont}10}$ | General contact reduction between individuals during the “hard lockdown”        | 65%   |
